# Supplementary material
Source: publisher figshare collection journal article supplement (https://sage.figshare.com/ndownloader/files/20225292)
Supplement: Supplementary file 1 [file 20225292]

**Panel A: Linkert scale questions with tick boxes for strongly agree, agree, neutral, disagree and strongly disagree:**

1. The session was successful at raising awareness of the importance of Handwashing?
2. The session helped increase your child's knowledge/understanding of the following areas;
  - Why we wash hands
  - Germs/bacteria
  - When to wash hands
  - Parts of hands that are difficult to wash
3. Do you think the session will improve your child's handwashing, even if only for one day?

**Panel B: Free Comment questions:**

1. How would you describe the session and the activities carried out by the facilitator?
2. Were the interactive sessions on handwashing interesting to you and to your child? If yes; Do you recommend the sessions are provided to children in schools?
3. Can you suggest any ways to help make handwashing fun for children (at home, in the hospital or at school)?
4. Do you have any comments or suggestions?

**Supplementary Figure D.** Questions on the questionnaire distributed to carers of children aged 3-15 years. The same questions were used for children  $\geq 16$ , with the alteration to make them personal rather than referring to 'your child.' Visitors were asked about the child patient they were visiting. The carers made judgements based on a discussion with the child.
